# Supplementary material
Source: PubMed Central journal article supplement (PMC7611934)
Supplement: EMS137228-supplement-Supplementary_Materials.pdf [file EMS137228-supplement-Supplementary_Materials.pdf]

726 **A**

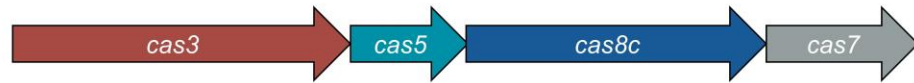

|                                | Cas3 (%)                   | Cas5 (%)                   | Cas8 (%)                   | Cas7 (%)                   |
|--------------------------------|----------------------------|----------------------------|----------------------------|----------------------------|
| <i>Bacillus halodurans</i> *   | Query cover.: 98<br>ID: 32 | Query cover.: 93<br>ID: 31 | Query cover.: 96<br>ID: 24 | Query cover.: 94<br>ID: 35 |
| <i>Bacillus cereus</i>         | Query cover.: 91<br>ID: 31 | Query cover.: 93<br>ID: 29 | Query cover.: 19<br>ID: 29 | Query cover.: 94<br>ID: 33 |
| <i>Lactobacillus fermentum</i> | Query cover.: 97<br>ID: 27 | Query cover.: 93<br>ID: 28 | Query cover.: 78<br>ID: 22 | Query cover.: 87<br>ID: 31 |
| <i>Mycobacterium canettii</i>  | Query cover.: 93<br>ID: 36 | Query cover.: 93<br>ID: 41 | Query cover.: 99<br>ID: 28 | Query cover.: 95<br>ID: 45 |
| <i>Streptococcus pyogenes</i>  | Query cover.: 92<br>ID: 28 | Query cover.: 91<br>ID: 29 | Query cover.: 23<br>ID: 31 | Query cover.: 84<br>ID: 34 |

727

728 **B**

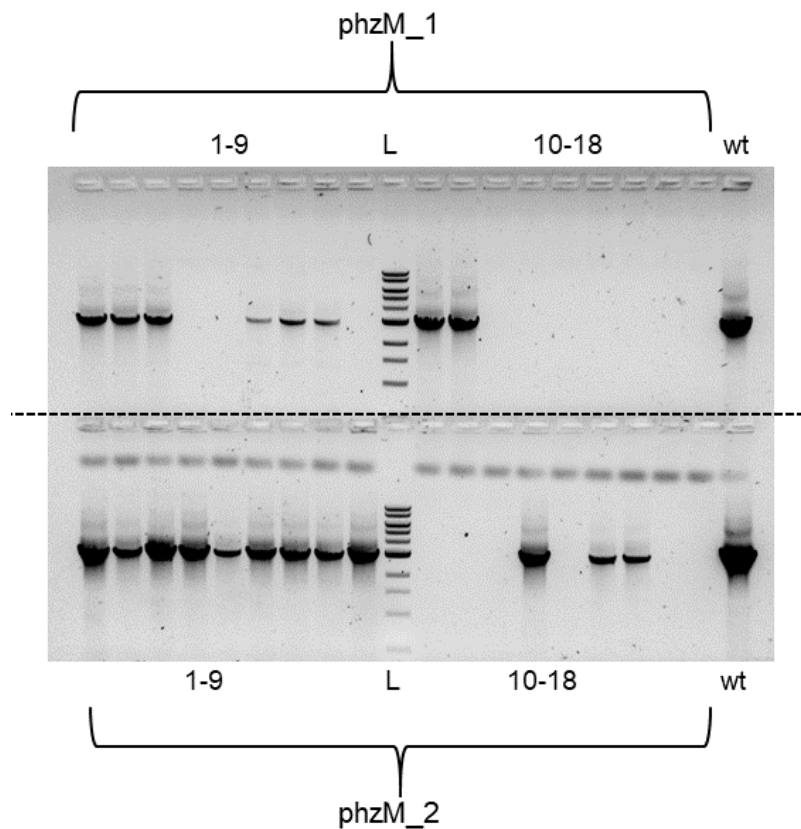

729

730

731 **Supplementary Figure 1. A)** Comparison of Type I-C CRISPR system from *P. aeruginosa*  
 732 used in the study, to various other previously identified I-C systems from a range of different  
 733 bacteria. Values show query coverage and percent identity (ID) percentages comparing the four

734 genes of the *P. aeruginosa* system to each of the other four. \* Denotes the reference Type I-C  
735 CRISPR system referred to in Ref. 1. **B)** PCR amplification of a 3 kb genomic fragment flanking  
736 the *phzM* gene targeted using two different crRNAs, phzM\_1 and phzM\_2. Colony PCRs were  
737 performed on 18 biological replicates of self-targeted strains for each crRNA. The  
738 PAO1<sup>IC</sup>parental strain is used as a positive control (wt). L indicates a 1 kb DNA ladder.

739

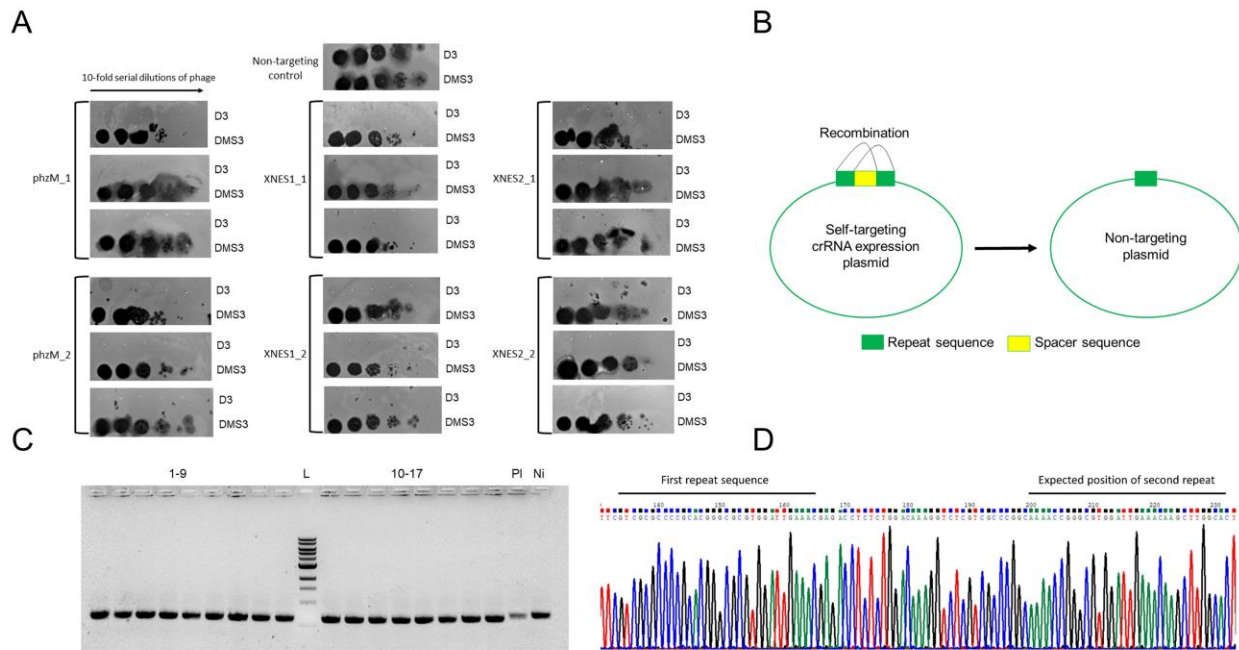

741

742

743 **Supplementary Figure 2. A)** Phage targeting assays with survivors that had no discernable  
 744 deletion of the crRNA-targeted genomic site. Strains were transformed with a D3 phage-  
 745 targeting crRNA to assay for IC CRISPR-Cas3 activity. Three unique survivors were isolated  
 746 from six self-targeting assays for a total of 18 survivors. Control is a non-targeting crRNA. **B)**  
 747 Schematic of spacer excision events where the two direct repeats recombine, resulting the loss  
 748 of the targeting spacer. **C)** PCR amplification of the crRNA sequence from plasmids isolated  
 749 from 17 non-deletion self-targeted survivors. PI indicates the original plasmid as the PCR  
 750 template, Ni indicates a sample where the crRNA was not induced, L indicates a 1 kb DNA  
 751 ladder. **D)** Sample chromatogram of a sequenced plasmid with the spacer flipped out. Only one  
 752 32 bp repeat sequence remains in the plasmid, the 34 bp spacer sequence and other 32 bp  
 753 repeat are missing.

754

755

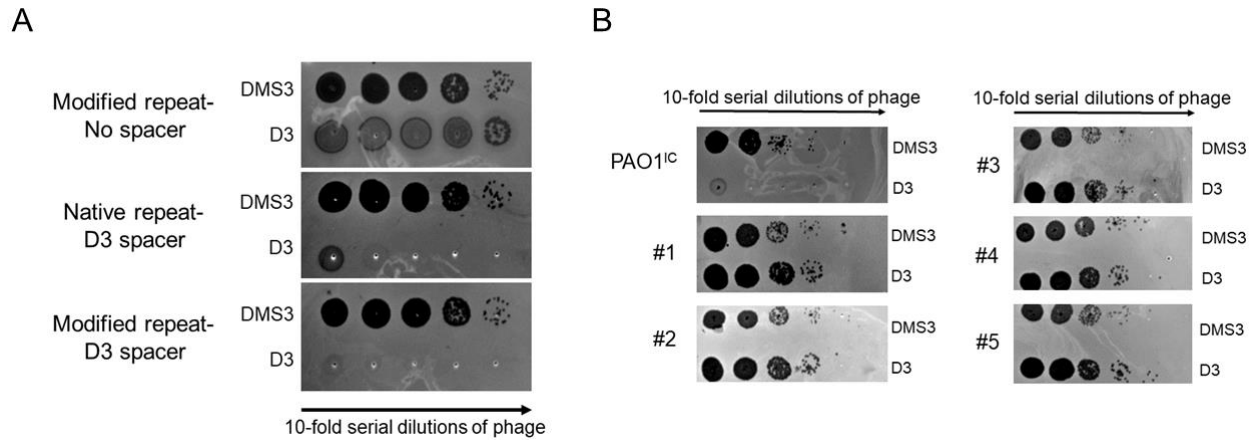

756

757

758 **Supplementary Figure 3. A)** Phage-targeting assay showing the activity of the modified repeat  
759 crRNA constructs. Ten-fold serial dilutions of DMS3 phage and D3 phage were spotted on  
760 lawns of PAO1<sup>IC</sup> expressing either empty vector (top), a crRNA targeting D3 with WT direct  
761 repeats (middle), or a crRNA targeting D3 with modified repeats (bottom). **B)** Phage targeting  
762 assay of five non-deletion self-targeting survivors expressing a D3 phage targeting crRNA.  
763 Unsuccessful targeting of phage indicates a non-functional CRISPR-Cas system in these  
764 strains. The parental PAO1<sup>IC</sup> strain with a functional CRISPR-Cas system was used as a  
765 control.

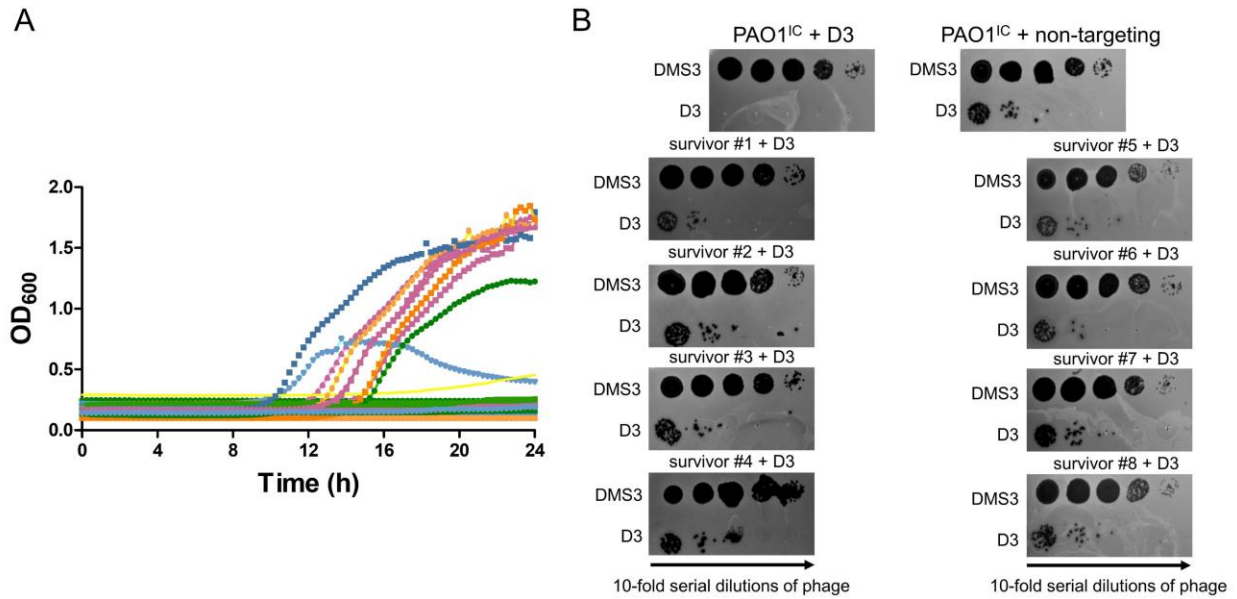

767

768 **Supplementary Figure 4. A)** Growth curves of 36 PAO1<sup>IC</sup> biological replicates targeting the  
 769 essential gene, *rplQ*, using the MR crRNA plasmid. **B)** Phage targeting assays with eight  
 770 isolated *rplQ*-targeted survivors to assay for I-C CRISPR-Cas activity. Serial dilutions of DMS3  
 771 phage and D3 phage were spotted on lawns of PAO1<sup>IC</sup> expressing a crRNA targeting phage D3.  
 772 The parent PAO1<sup>IC</sup> strain expressing a D3 targeting crRNA (top left) was used as a positive  
 773 control, while PAO1<sup>IC</sup> expressing a non-targeting crRNA was used as a negative control.

774

775

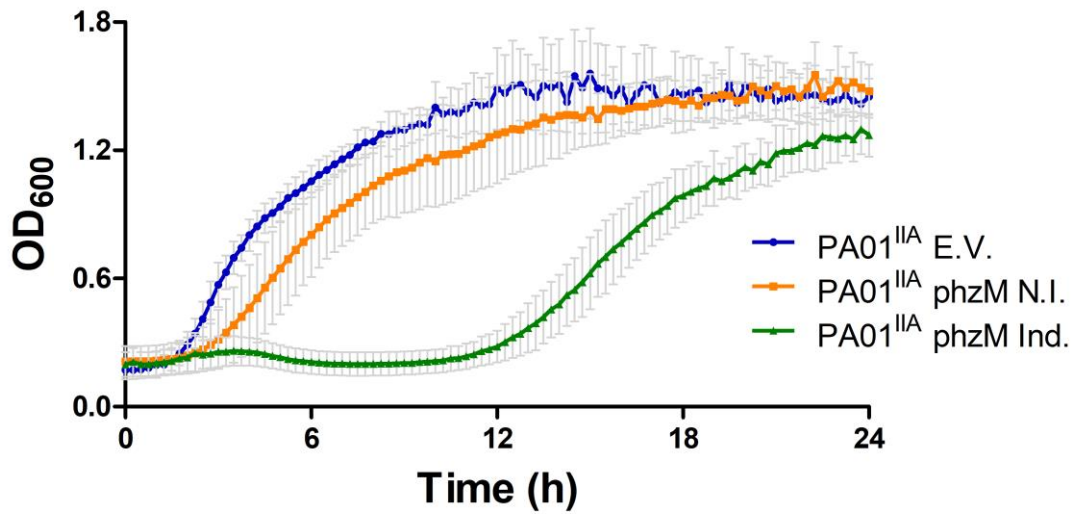

776

777

778 **Supplementary Figure 5.** Growth of self-targeting strains of PAO1<sup>IIA</sup> expressing a self-targeting  
779 gRNA targeting the genome at *phzM* (Ind.). An empty vector (E.V.) and a non-induced *phzM*  
780 targeting strain (N.I.) were used as controls. Mean OD values measured at 600 nm are shown  
781 for 8 biological replicates each, error bars indicate SD values.

782

783

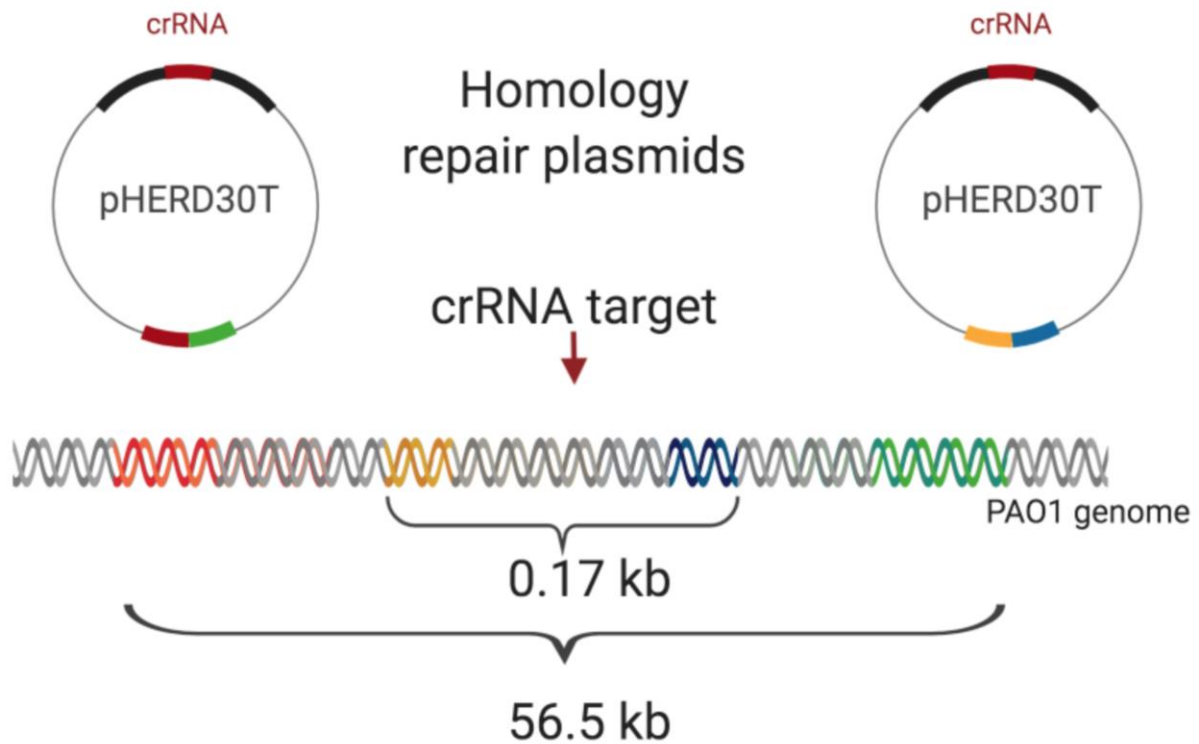

784

785

786 **Supplementary Figure 6.** Schematic overview of the generation of deletions with  
787 predetermined coordinates of various sizes. Sequences with ~400 bp homology to genomic  
788 sites (purple and yellow boxes for the short deletion, red and orange boxes for the long deletion)  
789 were cloned into the vector crRNA vector.

790

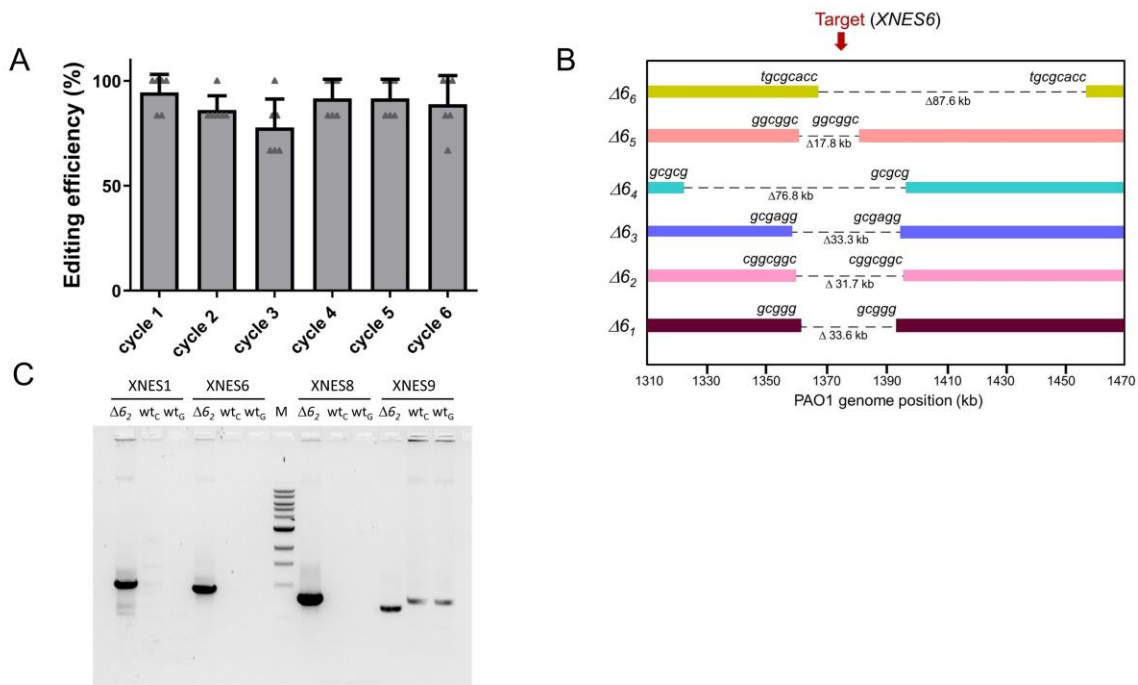

792

793

794 **Supplementary Figure 7. A)** Deletion efficiencies observed over six cycles of iterative self-  
 795 targeting. Six genomic targets were targeted in six different orders. Six survivors were analyzed  
 796 using site-specific PCR after each cycle, for a total of 36 analyzed colonies (6\*6) after each  
 797 cycle. **B)** Deletion junctions at XNES6 target site of the 6 PAO1<sup>IC</sup> strains with 6 iterative  
 798 targeting events each. Sequences of each specific microhomology for the junctions are shown  
 799 for each strain above the bars representing the given genomes at both ends, deletion sizes are  
 800 shown below dashed lines for each strain. **C)** PCR analysis using a representative set of  
 801 primers amplifying various large deletion junctions (at XNES1, 6, 8, and 9 regions) of the whole-  
 802 genome sequenced  $\Delta 6_2$  strain.  $\Delta 6_2$  served as a positive control template, while wt<sub>C</sub> represents  
 803 untargeted PAO1<sup>IC</sup> cells scraped from a lawn of colonies grown on plates serving as templates,  
 804 and wt<sub>G</sub> represents isolated genomic DNA from 1.5 ml overnight culture of untargeted PAO1<sup>IC</sup>  
 805 used as templates. Bands appearing for the XNES9 deletion junction for the PAO1<sup>IC</sup> samples  
 806 were aspecific and when sequenced, did not match any genomic region of the PAO1<sup>IC</sup> genome.

807





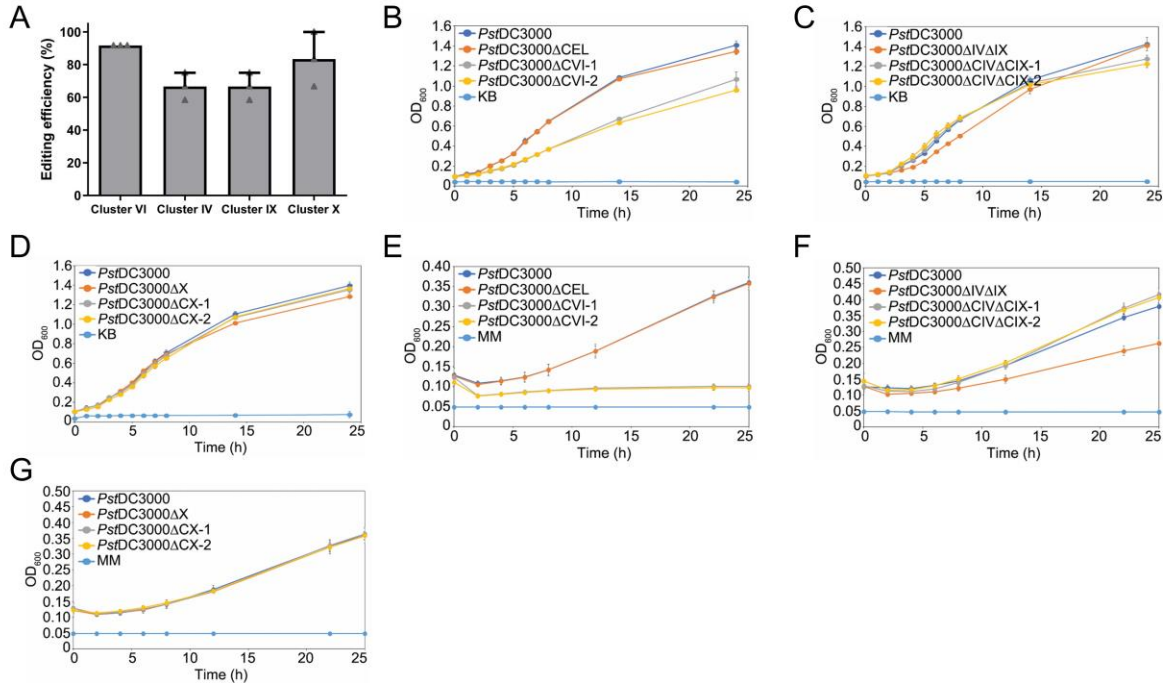

825

826

827 **Supplementary Figure 9. A)** Percentage of survivors with targeted deletions in clusters of non-  
 828 essential virulence effector genes in *P. syringae* pv. *tomato* DC3000. Values are averages of  
 829 three biological replicates where 12 individual colonies were analyzed using site-specific PCR  
 830 for each, error bars show standard deviations. **B)** *In vitro* growth of cluster VI deletion strains in  
 831 King's medium B (KB).  $\Delta$ CEL is the previously published polymutant, while  $\Delta$ CVI-1 and  $\Delta$ CVI-2  
 832 are Cas3-generated mutants. Error bars represent standard deviation,  $n = 4$ . **C)** *In vitro* growth of  
 833 cluster IV, cluster IX deletion strains in KB.  $\Delta$ CEL is the previously published polymutant, while  
 834  $\Delta$ CIV $\Delta$ CIX-1 and  $\Delta$ CIV $\Delta$ CIX-2 are Cas3-generated mutants. Error bars represent standard  
 835 deviation,  $n = 4$ . **D)** *In vitro* growth of cluster X deletion strains in KB.  $\Delta$ CEL is the previously  
 836 published polymutant, while  $\Delta$ CX-1 and  $\Delta$ CX-2 are Cas3-generated mutants. Error bars  
 837 represent standard deviation,  $n = 4$ . **E)** *In vitro* growth of cluster VI deletion strains in apoplast  
 838 mimicking minimal media (MM).  $\Delta$ CEL is the previously published polymutant, while  $\Delta$ CVI-1 and  
 839  $\Delta$ CVI-2 are Cas3-generated mutants. Error bars represent standard deviation,  $n = 4$ . **F)** *In vitro*  
 840 growth of cluster IV, cluster IX deletion strains in MM.  $\Delta$ CEL is the previously published  
 841 polymutant, while  $\Delta$ CIV $\Delta$ CIX-1 and  $\Delta$ CIV $\Delta$ CIX-2 are Cas3-generated mutants. Error bars  
 842 represent standard deviation,  $n = 4$ . **G)** *In vitro* growth of cluster X deletion strains in MM.  $\Delta$ CEL  
 843 is the previously published polymutant, while  $\Delta$ CX-1 and  $\Delta$ CX-2 are Cas3-generated mutants.  
 844 Error bars represent standard deviation,  $n = 4$ .

845

846

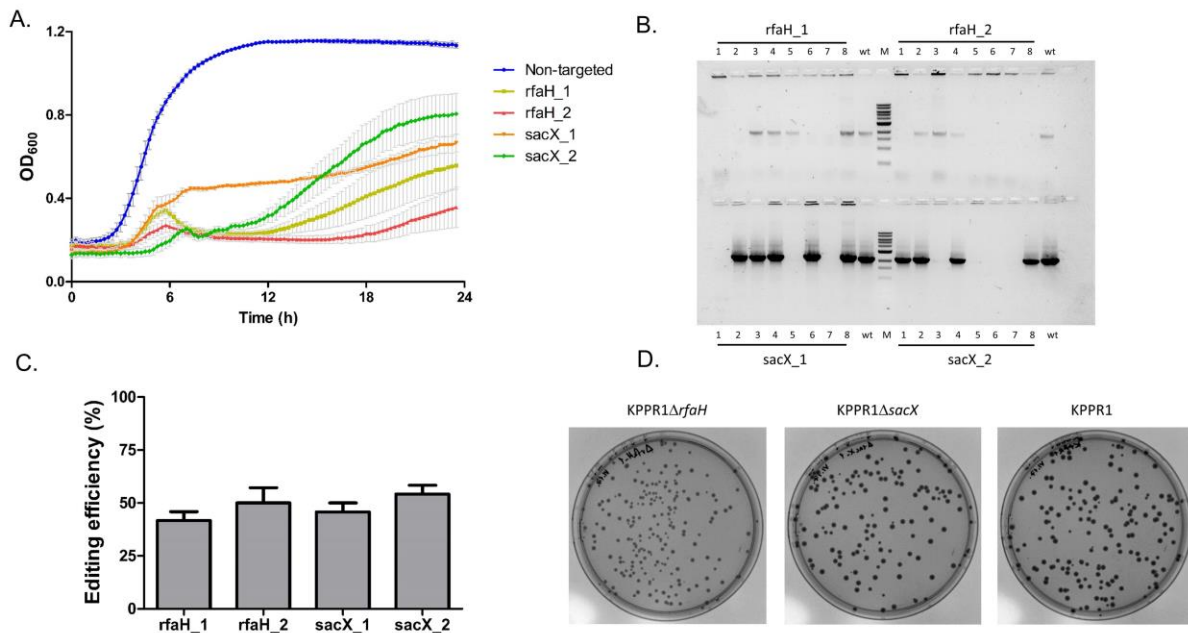

847

848 **Supplementary Figure 10. CRISPR-Cas3 editing in *Klebsiella pneumoniae*.** **A)** Growth curves  
 849 of *K. pneumoniae* strains expressing distinct crRNAs targeting *rfaH* and *sacX* (2 each). Non-  
 850 targeting crRNA expressing control is marked in blue. Values depicted are averages of 8  
 851 biological replicates each. **B)** Representative gel electrophoresis of PCR fragments amplified  
 852 from 8 total surviving colonies each from the 4 crRNA targeting constructs. Primer pairs  
 853 amplified regions flanking the targeted position at *rfaH* and *sacX*. Wild-type KPPR1 (wt) colonies  
 854 were used as controls, M represents 1 kb DNA marker ladder. **C)** Percentage of survivors with  
 855 targeted deletions at the targeted genomic positions. Values are averages of three biological  
 856 replicates where 8 individual colonies were analyzed using site-specific PCR for each, error  
 857 bars show standard deviations. **D)** Colony morphologies of deletion candidate strains of *rfaH*  
 858 and *sacX* compared to wild-type *K. pneumoniae* KPPR1.

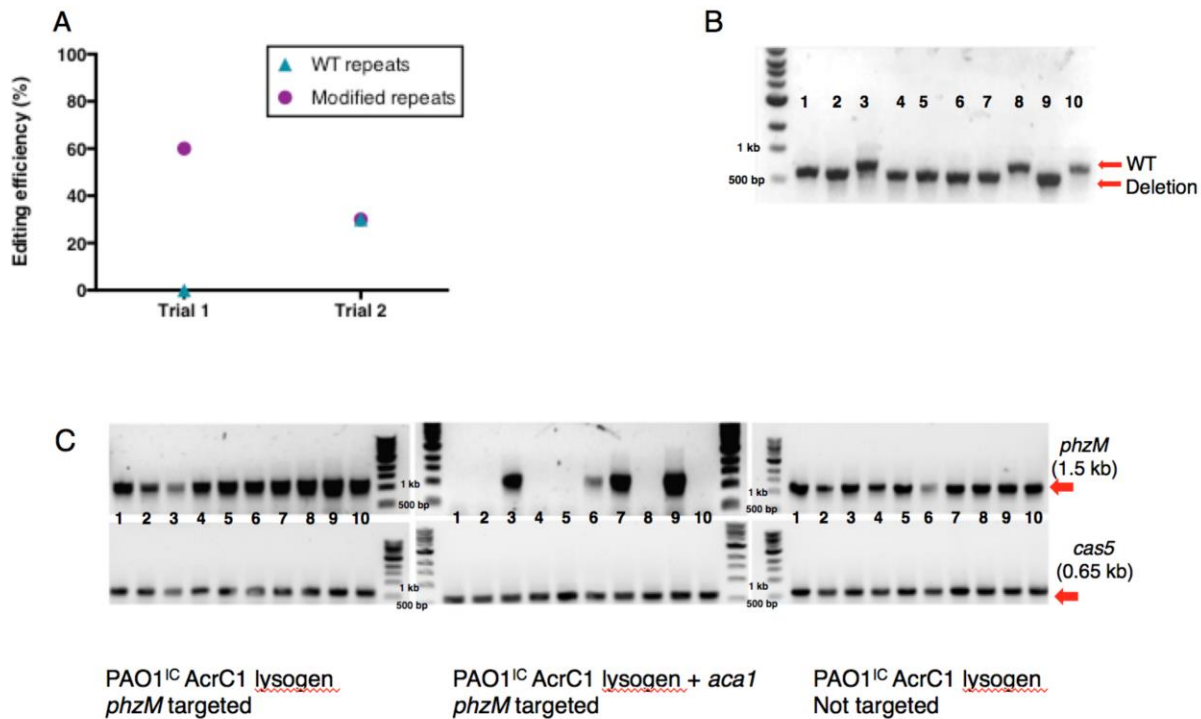

860

861

862 **Supplementary Figure 11. A)** Editing efficiencies for the *Pseudomonas aeruginosa*  
 863 environmental isolate naturally expressing the Type I-C *cas* genes, transformed with a plasmid  
 864 targeting *phzM* with WT repeats or modified repeats. Each data point represents the fraction of  
 865 isolates with the deletion out of ten isolates assayed. **B)** Genotyping results for the  
 866 *Pseudomonas aeruginosa* environmental isolate using the 0.17 kb HDR template. Larger band  
 867 corresponds to the WT sequence, smaller band corresponds to a genome reduced by 0.17 kb.  
 868 **C)** Genotyping results of PAO1<sup>IC</sup> AcrC1 lysogens after self-targeting induction in the presence  
 869 or absence of *aca1* and a non-targeted control. Ten biological replicates per strain were  
 870 assayed. gDNA was extracted from each replicate and PCR analysis for the *phzM* gene  
 871 (targeted gene, top row of gels) or *cas5* gene (non-targeted gene, bottom row) was conducted.  
 872 Only cells that co-expressed *aca1* with the crRNA showed loss of the *phzM* band, indicating  
 873 genome editing. All replicates had a *cas5* band, indicating successful gDNA extraction and  
 874 target specificity for the *phzM* locus.

875

876

| Region  | Coordinates       | Size   |
|---------|-------------------|--------|
| XNES 1  | 27535 – 142359    | 114 kb |
| XNES 2  | 143267 – 371151   | 228 kb |
| XNES 3  | 491900 – 606160   | 114 kb |
| XNES 4  | 841825 – 986817   | 145 kb |
| XNES 5  | 1147815 – 1249907 | 102 kb |
| XNES 6  | 1260442 – 1491913 | 232 kb |
| XNES 7  | 1974210 – 2150828 | 176 kb |
| XNES 8  | 2216121 – 2375804 | 160 kb |
| XNES 9  | 2376541 – 2923367 | 546 kb |
| XNES 10 | 2972700 – 3079197 | 106 kb |
| XNES 11 | 3155072 – 3309411 | 154 kb |
| XNES 12 | 3587303 – 3802567 | 216 kb |
| XNES 13 | 3897357 – 4062426 | 165 kb |
| XNES 14 | 4294208 – 4457362 | 163 kb |
| XNES 15 | 4576324 – 4753990 | 178 kb |
| XNES 16 | 6025305 – 6180942 | 156 kb |

877

878

879

880 **Supplementary Table 1.** Extended, non-essential regions (XNES) of *P. aeruginosa* PAO1  
881 genome with contiguous, individually non-essential genes in a complex laboratory medium  
882 exceeding 100 kb. Data based on a transposon sequencing dataset from Turner *et al.*<sup>39</sup>.

883

884 **Supplementary Table 2.** Genomic coordinates and extent of homologous sequences at  
885 genomic deletion junctions of whole-genome sequenced self-targeting strains of *P. aeruginosa*,  
886 *P. syringae*, and *E. coli*. See separate Excel File.

887

888

| Strain | Edited gene | HR edits (%) | Nontemplated edits (%) | No edits (%) | n  | Designed deletion (bp) | HR template length (left + right, bp) |
|--------|-------------|--------------|------------------------|--------------|----|------------------------|---------------------------------------|
| PA14   | <i>psiF</i> | 100          | 0                      | 0            | 12 | 0.5                    | 600 + 600                             |
| PA14   | <i>rebB</i> | 50           | 50                     | 0            | 16 | 4.1                    | 600 + 600                             |
| z8     | <i>ghlO</i> | 100          | 0                      | 0            | 5  | 0.2                    | 600 + 600                             |
| z8     | <i>mexZ</i> | 75           | 25                     | 0            | 12 | 0.6                    | 722 + 600                             |
| z8     | <i>psiF</i> | 100          | 0                      | 0            | 12 | 0.5                    | 600 + 600                             |
| z8     | <i>qsrO</i> | 29(80)*      | 71                     | 0            | 14 | 0.4                    | 751 + 596                             |
| z8     | <i>teg</i>  | 75           | 25                     | 0            | 4  | 6.3                    | 800 + 809                             |

889

890

891 **Supplementary Table 3.** Summary of HR-mediated genome editing experiments using the  
892 Type I-F CRISPR-Cas3 system. Genes were targeted for deletion in the strains PA14 and z8.  
893 Experiments targeted 4 single genes and 2 gene blocks, *teg* and *rebB*. Transformants were  
894 classified as 1) 'HR edits' that have the HR designed deletion; 2) 'non-templated edits' that have  
895 a non-designed deletion encompassing the targeted gene, 3) 'no edits' where the targeted gene  
896 is intact. (\*) two colony morphologies with different editing frequencies were obtained in this  
897 experiment. The HR arms were designed to be of 600 bp on average. The arm length was  
898 increased to ~800 bp for the deletion >5 kb. The variability around the average arm length  
899 values comes from technical constraints, such as selection of adequate primer sequences or  
900 avoidance of regions not optimal for Gibson assembly.

901

902

903 **Supplementary Table 4.** List of oligonucleotides (including crRNA sequences) used in the  
904 study. See separate Excel File.

905
